# Supplementary material
Source: ML conference proceedings conference paper supplement (https://openaccess.thecvf.com/content/CVPR2022/html/Liang_Tree_Energy_Loss_CVPR_2022_paper.html)
Supplement: Supplementary file 1 [file Liang_Tree_Energy_Loss_CVPR_2022_supplemental.pdf]

# Tree Energy Loss: Towards Sparsely Annotated Semantic Segmentation

## Supplementary Material

Zhiyuan Liang<sup>1</sup> Tiancai Wang<sup>2</sup> Xiangyu Zhang<sup>2</sup>  
Jian Sun<sup>2</sup> Jianbing Shen<sup>3\*</sup>

<sup>1</sup>Beijing Institute of Technology <sup>2</sup>MEGVII Technology <sup>3</sup>SKL-IOTSC, University of Macau

### 1. Failure cases

Fig. 1 shows some failure cases of our method. The predictive error occurs due to the color mutation within one object region or the color similarity between two semantic objects. Since our approach partially relies on the low-level color prior to generate the pseudo labels, so it may make wrong predictions under point-wise supervision. Fortunately, the predictive error can be reduced by introducing more complete annotations (i.e., scribble annotation).

### 2. Computational costs

The proposed method can be plugged into most existing semantic segmentation frameworks. During inference time, the auxiliary branch is removed to avoid extra memory costs. During training, the GPU loads on Pascal VOC 2012 dataset are reported in Tab. 1. The DeeplabV3+ and the LTF [3] are selected as the baselines. The resolution of the input image is  $512 \times 512$  and the batch size is 16. Leveraging the low-level information almost introduces no extra memory cost. Overall, introducing both low-level and high-level information requires 1.93 and 1.78 GB GPU loads for DeeplabV3+ and LTF models, respectively.

### 3. Visualizations of block-supervised settings

We synthesize the block-wise annotations for ADE20k [4] and Cityscapes [1] datasets. Given the full annotations of the image, we discard the annotations from the semantic boundary to the interior region until the ratio of the rest annotations reaches the preset threshold. The block-wise annotations are generated at 3 levels, including 10%, 20%, and 50% of full annotations. The visualizations of block-wise annotation for the two datasets are respectively illustrated in Fig. 2 and Fig. 3. Moreover, qualitative results of our method on the ADE20k and the Cityscapes datasets are illustrated in Fig. 4 and Fig. 5, respectively. Here, HRNet is selected as the segmentation model. The proposed ap-

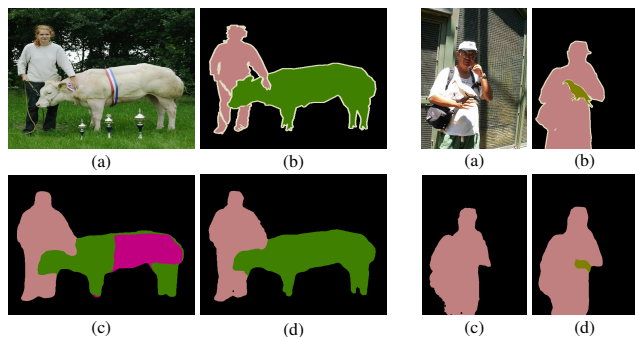

Figure 1. Failure cases of the proposed method on Pascal VOC 2012 dataset [2]. (a) input image. (b) ground truth. (c) result with point-wise supervision. (d) result with scribble-wise supervision.

| Low-level | High-level | DeeplabV3+    | LTF           |
|-----------|------------|---------------|---------------|
|           |            | 32.85         | 46.65         |
| ✓         |            | 32.86 (+0.01) | 46.67 (+0.02) |
| ✓         | ✓          | 34.78 (+1.93) | 48.43 (+1.78) |

Table 1. The memory cost (GB) during training, leveraging various levels of structural information.

proach can be used to train the segmentation model with the annotations of different sparsity.

### References

- [1] Marius Cordts, Mohamed Omran, Sebastian Ramos, Timo Rehfeld, Markus Enzweiler, Rodrigo Benenson, Uwe Franke, Stefan Roth, and Bernt Schiele. The cityscapes dataset for semantic urban scene understanding. In *CVPR*, 2016. 1
- [2] Mark Everingham, Luc Van Gool, Christopher KI Williams, John Winn, and Andrew Zisserman. The pascal visual object classes (voc) challenge. *IJCV*, 88(2):303–338, 2010. 1
- [3] Lin Song, Yanwei Li, Zeming Li, Gang Yu, Hongbin Sun, Jian Sun, and Nanning Zheng. Learnable tree filter for structure-preserving feature transform. In *NeurIPS*, 2019. 1
- [4] Bolei Zhou, Hang Zhao, Xavier Puig, Sanja Fidler, Adela Barriuso, and Antonio Torralba. Scene parsing through ade20k dataset. In *CVPR*, 2017. 1

\*Corresponding author: Jianbing Shen.

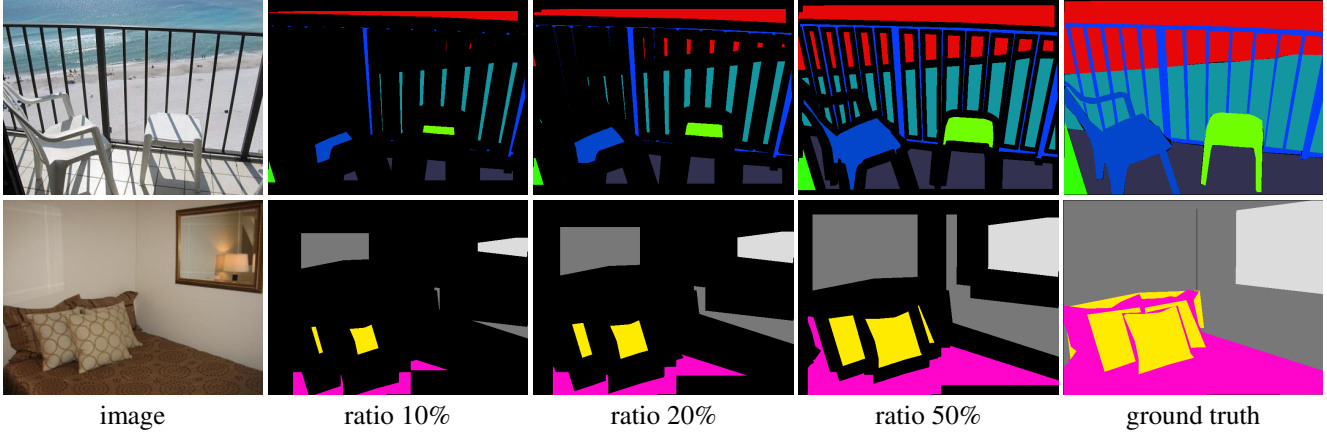

Figure 2. The block-wise annotations for ADE20k dataset.

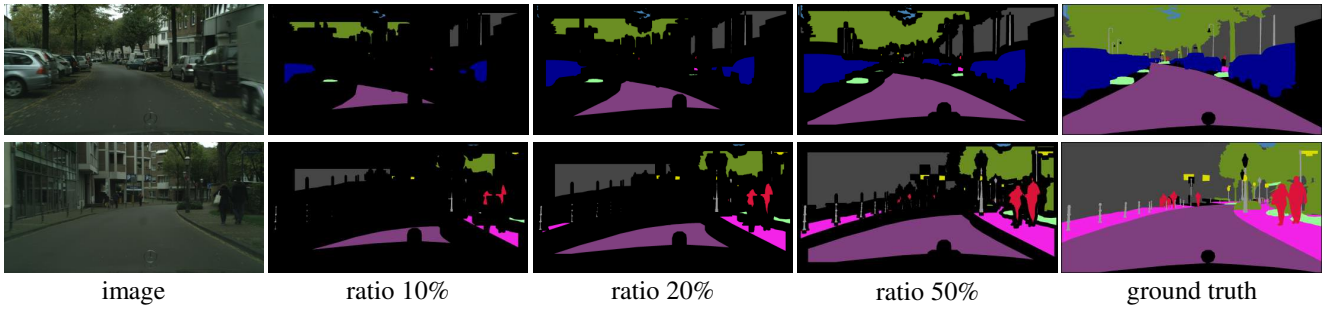

Figure 3. The block-wise annotations for Cityscapes dataset.

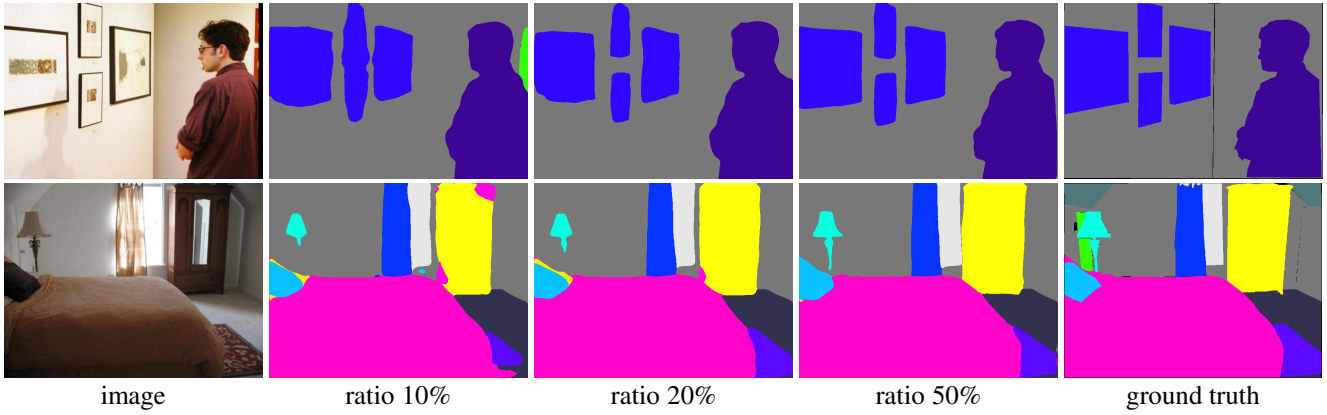

Figure 4. Qualitative results for the proposed TEL on ADE20k dataset.

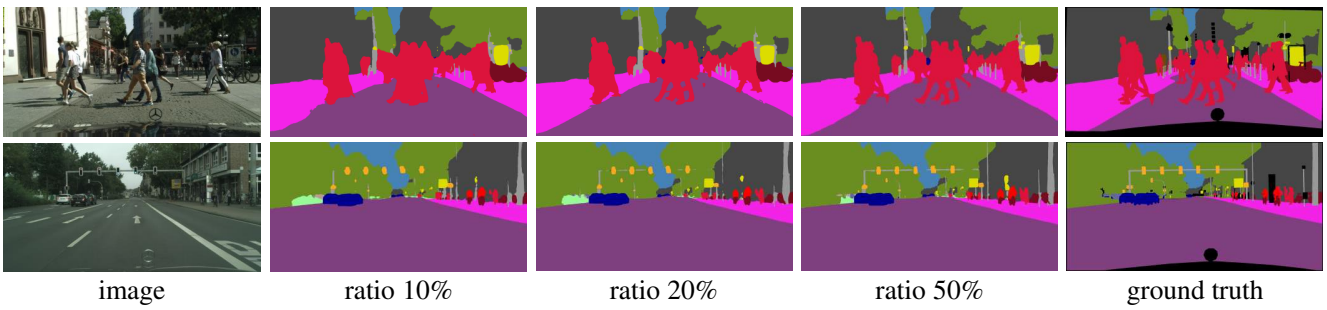

Figure 5. Qualitative results for the proposed TEL on Cityscapes dataset.
